# Supplementary material for: Brain transcriptome analysis of a CLN2 mouse model as a function of disease progression
Source: PubMed Central journal article supplement (PMC8576919; doi:10.1186/s12974-021-02302-z), 2021-11-08
Supplement: 12974_2021_2302_MOESM4_ESM.pdf [file 12974_2021_2302_MOESM4_ESM.pdf]

Additional File 4. Relative differential expression of activated astrocyte signature genes (FPKM in *Tpp1*<sup>-/-</sup> relative to control) at different ages.

|              | Gene      | F/M  |      |       |       |  | Cb   |      |      |       |
|--------------|-----------|------|------|-------|-------|--|------|------|------|-------|
|              |           | 1mo  | 2mo  | 3mo   | 4 mo  |  | 1mo  | 2mo  | 3mo  | 4mo   |
| PAN-Reactive | Lcn2      | 0.83 | 0.43 | 0.68  | 1.46  |  | 0.72 | 0.27 | 0.99 | 5.75  |
|              | Steap4    | 1.21 | 1.32 | 1.04  | 1.52  |  | 1.38 | 1.13 | 2.60 | 1.60  |
|              | S1pr3     | 1.02 | 0.96 | 0.94  | 1.10  |  | 0.89 | 0.82 | 1.61 | 3.59  |
|              | Timp1     | ND   | ND   | 2.82  | 3.28  |  | ND   | ND   | 4.98 | 9.30  |
|              | Cxcl10    | ND   | 2.59 | 12.18 | 17.47 |  | ND   | 0.93 | 6.38 | 7.41  |
|              | Cd44      | 1.09 | 0.95 | 1.14  | 1.19  |  | 1.06 | 1.16 | 1.66 | 2.31  |
|              | Osmr      | 1.16 | 1.25 | 1.53  | 1.56  |  | 0.93 | 1.13 | 1.71 | 2.65  |
|              | Serpina3n | 1.07 | 0.89 | 2.10  | 2.55  |  | 1.37 | 0.53 | 6.00 | 19.44 |
|              | Aspg      | 1.08 | 1.05 | 1.89  | 1.79  |  | 0.99 | 1.01 | 1.77 | 3.37  |
|              | GFAP      | 1.14 | 1.25 | 2.64  | 3.31  |  | 1.28 | 1.07 | 3.39 | 7.29  |
| A1-reactive  | C3        | 1.14 | 0.85 | 1.85  | 2.41  |  | 1.35 | 0.95 | 3.85 | 11.16 |
|              | H2-T23    | 1.10 | 0.87 | 1.14  | 1.36  |  | 1.13 | 0.83 | 1.28 | 1.59  |
|              | H2-D1     | 1.02 | 1.00 | 1.37  | 2.07  |  | 1.15 | 0.99 | 1.12 | 1.16  |
|              | Ggta1     | 1.01 | 0.96 | 1.50  | 1.17  |  | 1.14 | 0.98 | 1.10 | 1.98  |
|              | Iigp1     | 0.86 | 1.12 | 1.76  | 2.45  |  | 0.60 | 1.08 | 1.24 | 2.66  |
|              | Gbp2      | 1.11 | 1.16 | 1.71  | 2.06  |  | 0.95 | 1.07 | 1.37 | 2.40  |
|              | Fbln5     | 1.04 | 1.39 | 0.95  | 1.08  |  | 1.16 | 1.16 | 0.95 | 1.89  |
|              | Fkbp5     | 1.20 | 1.01 | 1.30  | 0.92  |  | 1.31 | 0.93 | 1.66 | 1.41  |
|              | Psmb8     | 1.07 | 0.88 | 1.98  | 2.21  |  | 1.28 | 0.71 | 1.19 | 2.04  |
| A2-reactive  | Tgm1      | ND   | ND   | ND    | 10.26 |  | ND   | ND   | ND   | 30.24 |
|              | Ptx3      | ND   | ND   | ND    | 0.80  |  | ND   | ND   | ND   | 3.18  |
|              | S100a10   | 1.09 | 0.86 | 1.09  | 1.04  |  | 1.14 | 1.01 | 1.32 | 1.50  |
|              | Cd109     | 0.86 | 1.49 | 1.02  | 1.39  |  | 1.07 | 0.89 | 1.42 | 3.12  |
|              | Ptgs2     | 1.10 | 0.63 | 0.89  | 0.75  |  | 0.71 | 0.71 | 0.88 | 2.17  |
|              | Cd14      | 0.96 | 1.08 | 1.56  | 1.72  |  | 0.99 | 1.21 | 2.91 | 3.79  |

ND: Not detected
